# Supplementary material
Source: Springer Nature journal article supplement (https://www.springermedizin.de/resource/supplementary/12889_2010_2999_MOESM1_ESM.pdf/9487854)

# The Appalachian Region

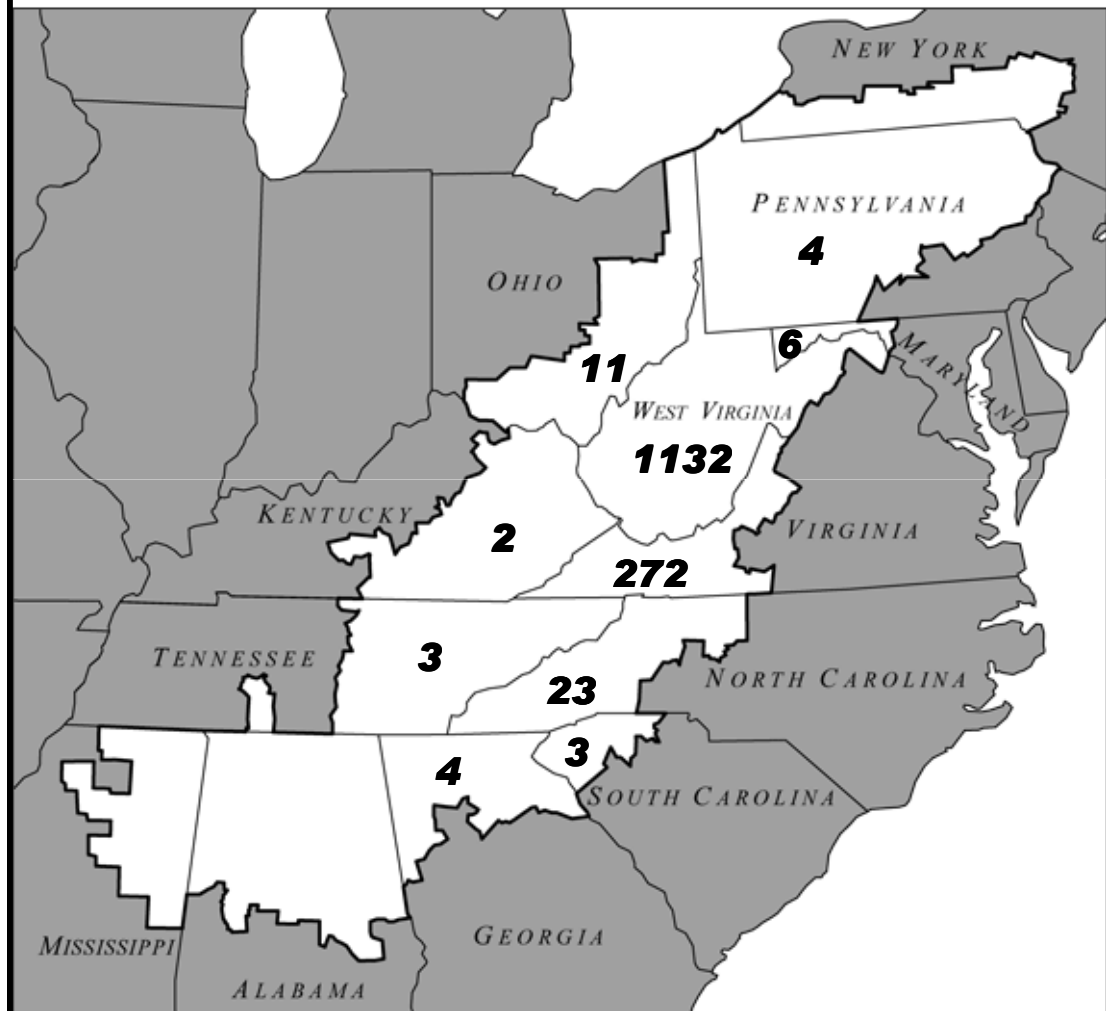

Supplement: MOESM1 [file 9487854]
